# Supplementary material for: Model of Care for Microelimination of Hepatitis C Virus Infection among People Who Inject Drugs
Source: MDPI journal article supplement (doi:10.3390/jcm10174001), 2021-09-03
Supplement: s1 [file s1]

**Table S1.** Characteristics of PWID with CHC started treatment according drugs use.

| <b>Characteristics</b>                       | <b>All patients<br/>(n = 358)</b> | <b>Former PWID<br/>(n = 284)</b> | <b>Recent PWID<br/>(n = 74)</b> | <b>p</b> |
|----------------------------------------------|-----------------------------------|----------------------------------|---------------------------------|----------|
| <b>Age &gt; 50</b>                           | 142 (39.7%)                       | 125 (44%)                        | 17 (23%)                        | 0.001    |
| <b>Male sex</b>                              | 297 (83%)                         | 231 (81.3%)                      | 66 (89.2%)                      | 0.110    |
| <b>BMI ≥ 25</b>                              | 179 (50%)                         | 152 (53.5%)                      | 27 (36.5%)                      | 0.009    |
| <b>Advanced fibrosis</b>                     | 176 (49.1%)                       | 146 (51.4%)                      | 30 (40.5%)                      | 0.096    |
| <b>Genotype:</b>                             |                                   |                                  |                                 |          |
| • 1a                                         | 149 (41.1%)                       | 110 (38.7%)                      | 39 (52.7%)                      | 0.063    |
| • 1b                                         | 21 (5.9%)                         | 17 (6%)                          | 4 (5.4%)                        |          |
| • 2                                          | 2 (0.6%)                          | 1 (0.4%)                         | 1 (1.4%)                        |          |
| • 3                                          | 142 (39.7%)                       | 123 (43.3%)                      | 19 (25.7%)                      |          |
| • 4                                          | 44 (12.3%)                        | 33 (11.6%)                       | 11 (14.9%)                      |          |
| <b>HCV treatment naive</b>                   | 281 (78.5%)                       | 220 (77.5%)                      | 61 (82.4%)                      | 0.354    |
| <b>Treated with third generation regimen</b> | 299 (83.5%)                       | 231 (81.3%)                      | 68 (91.8%)                      | 0.029    |
| <b>HBV coinfection</b>                       | 4 (1.1%)                          | 4 (1.4%)                         | 0                               | 0.585    |
| <b>Diabetes</b>                              | 20 (5.6%)                         | 19 (6.7%)                        | 1 (1.4%)                        | 0.090    |
| <b>Arterial hypertension</b>                 | 41 (11.5%)                        | 35 (12.3%)                       | 6 (8.1%)                        | 0.413    |
| <b>Psychiatric disorders</b>                 | 140 (39.1%)                       | 108 (38%)                        | 32 (43.2%)                      | 0.425    |
| <b>Any alcohol use</b>                       | 259 (72.3%)                       | 201 (70.8%)                      | 58 (78.4%)                      | 0.193    |
| <b>Current tobacco use</b>                   | 296 (82.7%)                       | 232 (81.7%)                      | 64 (86.5%)                      | 0.331    |
| <b>OST prescription</b>                      | 69% 247 ()                        | 180 (63.4%)                      | 67 (90.5%)                      | <0.001   |

CHC: chronic hepatitis C; BMI: body mass index; HCV: hepatitis C virus; HBV: hepatitis B virus; OST: opioid substitution treatment.
